# Supplementary material for: Phosphatase-like activity, DNA binding, DNA hydrolysis, anticancer and lactate dehydrogenase inhibition activity promoting by a new bis–phenanthroline dicopper(ii) complex
Source: Royal Society of Chemistry journal article supplement (doi:10.1039/c1dt10277j), 2011-01-01
Supplement: c1dt10277j.pdf [file c1dt10277j.pdf]

## Supplementary Information

### Phosphatase-like Activity, DNA Binding, DNA Hydrolysis, Anticancer and Lactate Dehydrogenase Inhibition activity Promoting by a New Bis-Phenanthroline Dicopper(II) Complex†

Sellamuthu Anbu<sup>a,‡</sup>, Muthusamy Kandaswamy<sup>a\*</sup>, Subbaiyan Kamalraj<sup>b</sup>, Johnpaul Muthumarry<sup>b</sup> and Babu Varghese<sup>c</sup>

<sup>a</sup>Department of Inorganic Chemistry, University of Madras, Guindy Maraimalai Campus, Chennai - 600 025, India. E-mail: [mkands@yahoo.com](mailto:mkands@yahoo.com); Fax: +91-44-22300488

<sup>b</sup>Centre for Advanced study in Botany, University of Madras, Guindy Maraimalai Campus, Chennai - 600 025, India.

<sup>c</sup>Sophisticated Analytical Instruments Facility, Indian Institute of Technology, Chennai - 600 036, India.

<sup>‡</sup>Present Address: Department of Chemistry, National Institute of Technology, Calicut, Kerala 673 601, India. E-mail: [anbus@nitc.ac.in](mailto:anbus@nitc.ac.in)

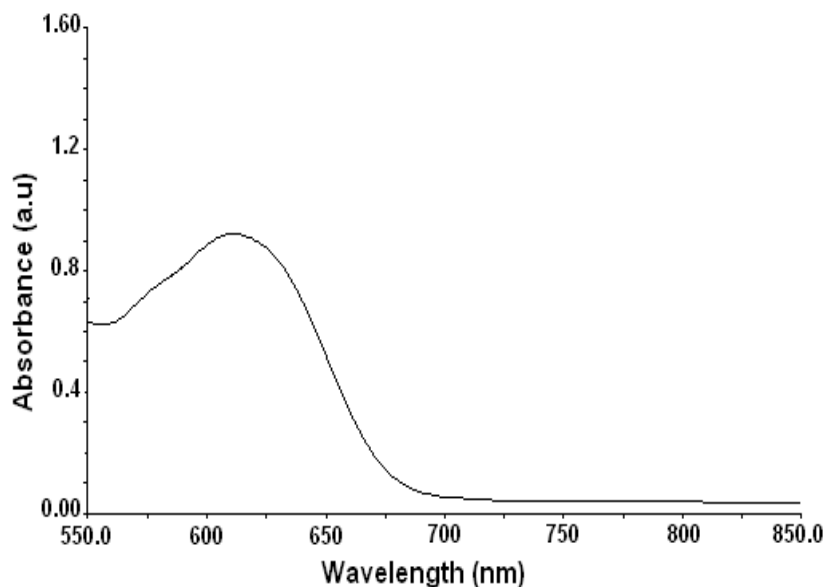

**Fig. S1.** Solid state electronic spectrum of  $[\text{Cu}_2(\mu\text{-OH}_2)(\mu\text{-CH}_3\text{COO})(\mu\text{-OH})(\text{phen})_2](\text{ClO}_4)_2$  complex (**1**).

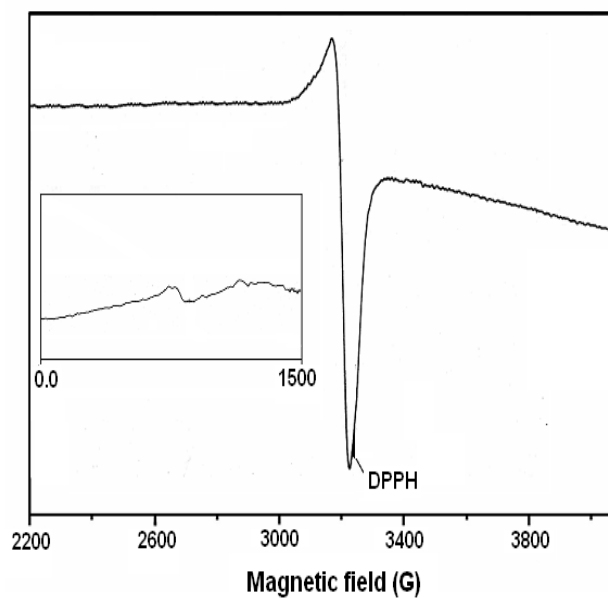

**Fig. S2.** X- band EPR spectrum of dinuclear complex **1** in MeCN at 77 K. Inset gives the EPR Showing the  $\Delta M_s = \pm 2$  transition.

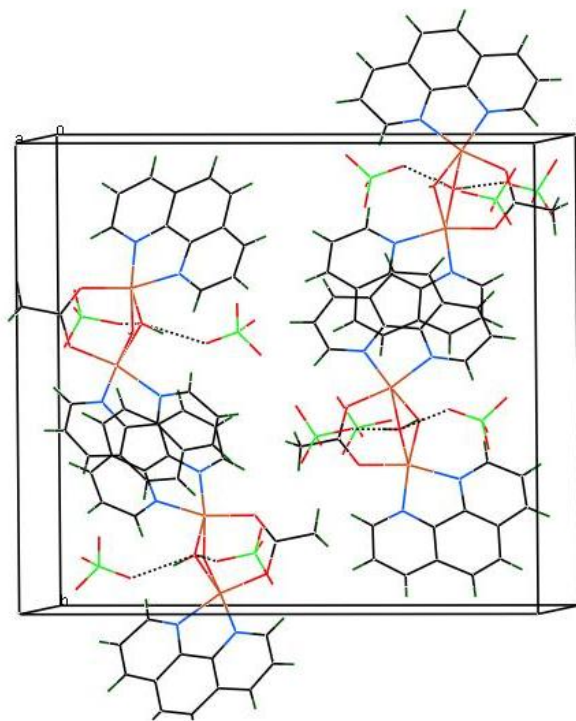

**Fig. S3.** The crystal packing of the binuclear Cu(II) complex **1**, viewed along the 'c' axis.

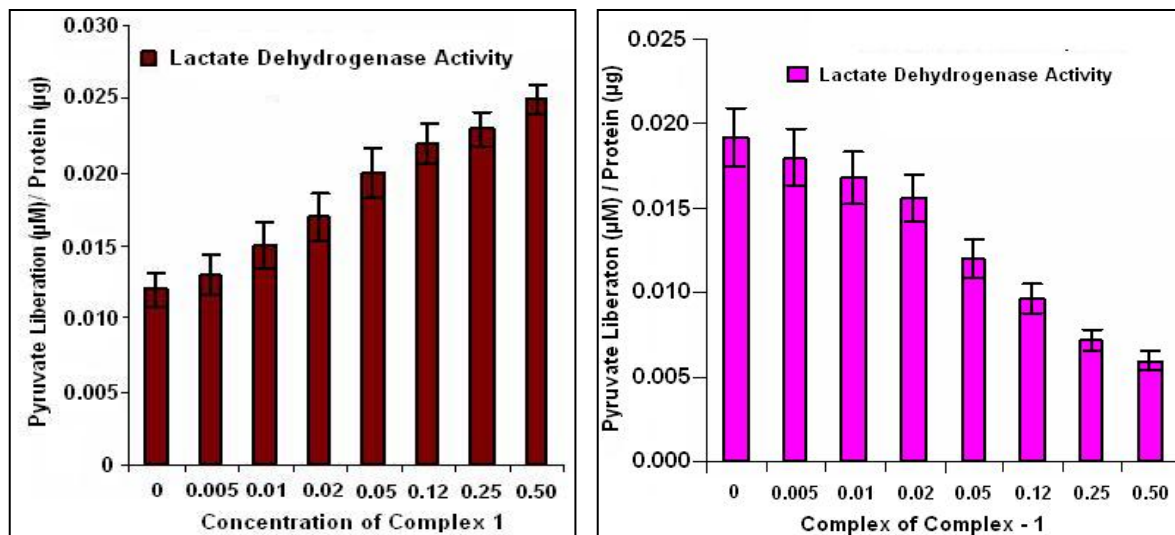

**Fig. S4.** Cytotoxic effect of complex-1 in MCF-7 cells assessed by lactate dehydrogenase activity in cell lysate for 48h. (b) Cytotoxic effect of complex-1 in MCF-7 cells assessed by lactate dehydrogenase activity in medium for 48h.

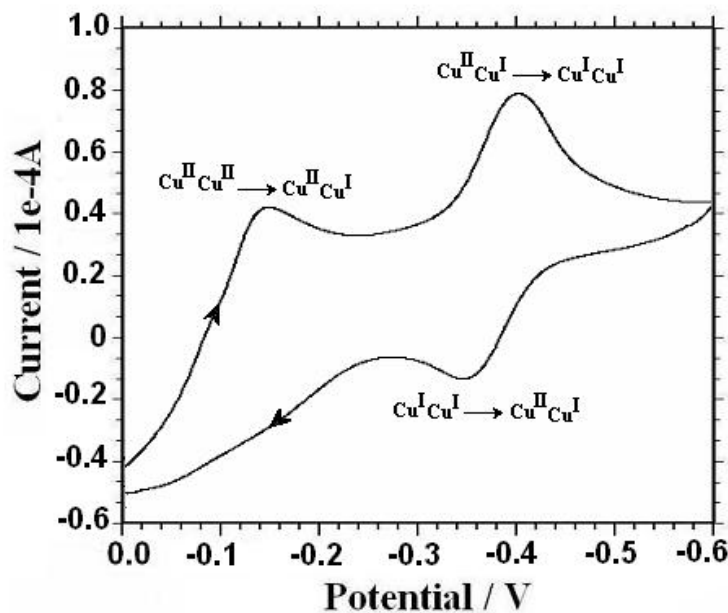

**Fig. S5.** Cyclic voltammogram of complex 1 measured in MeCN + 0.1 mol L<sup>-1</sup> TBAP (25 °C), using a Glassy Carbon Electrode as the working electrode.

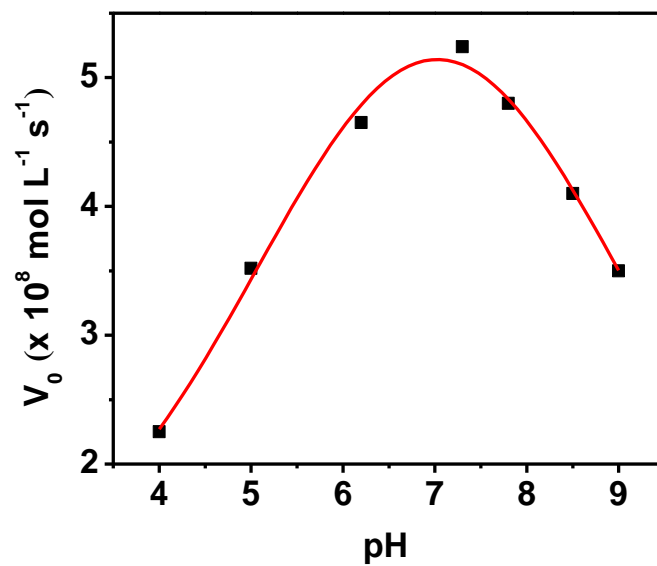

**Fig. S6.** The pH dependence plot for the binuclear Cu(II) complex **1** on phosphate hydrolysis reaction.
